# Supplementary material for: Metabolic characterisation of Magnetospirillum gryphiswaldense MSR-1 using LC-MS-based metabolite profiling
Source: Royal Society of Chemistry journal article supplement (doi:10.1039/d0ra05326k), 2020-01-01
Supplement: d0ra05326k1.xlsx [file d0ra05326k1.xlsx]

## Sheet: Title_page
Metabolic characterisation of Magnetospirillum gryphiswaldense MSR-1 using LC-MS-based metabolite profiling
Salah Abdelraziga, Laudina Safoa, Graham A Ranceb, Michael W Fayb,Eirini Theodosiouc, Paul D Tophamc, Dong-Hyun Kim*a and Alfred Fernández-Castané*c,d
aCentre for Analytical Bioscience, Advanced Materials and Healthcare Technologies Division, School of Pharmacy, University of Nottingham, Nottingham, NG7 2RD, UK
bNanoscale and Microscale Research Centre, University of Nottingham, Nottingham, NG7 2RD, UK
cAston Institute of Materials Research, Aston University, Birmingham, B4 7ET, UK
dEnergy and Bioproducts Research Institute, Aston University, Birmingham, B4 7ET, UK
* Alfred Fernández-Castané and Dong-Hyun Kim are joint corresponding authors.
Corresponding authors:
Alfred Fernández-Castané
Energy and Bioproducts Research Institute and Aston Institute of Materials Research, Aston University, Birmingham, B4 7ET, UK
Email: a.fernandez-castane1@aston.ac.uk
Tel: +44 (0)121 204 4870
Dong-Hyun Kim
Centre for Analytical Bioscience, School of Pharmacy, University of Nottingham, Nottingham, NG7 2RD, UK
Email: Dong-hyun.Kim@nottingham.ac.uk
Tel: +44 (0) 115 74 84697

## Sheet: Table S1 Authentic standards
Table S1 The composition of the authentic standard mixtures co-analysed with the samples using LC-HRMS for metabolite identification
No	Authentic standard*	Monoisotopic mass (Da)	Mass error (ppm)	Formula	RT** (min)	[M+H]+	[M-H]-
1	1,3-Diaminopropane	74.0844	0.91	C3H10N2	15.88	75.0917	73.0771
2	1-Aminocyclopropane-1-carboxylate	101.048	-0.15	C4H7NO2	9.95	102.055	100.04
3	1-Aminopropan-2-ol	75.0684	0.21	C3H9NO	12.32	76.0757	74.0611
4	1H-Imidazole-4-ethanamine	111.08	-0.47	C5H9N3	13.68	112.087	110.072
5	1-Naphthylacetic acid	186.068	0.84	C12H10O2	5.82	187.075	185.061
6	2-Aminoadipate	161.069	1.38	C6H11NO4	10.96	162.076	160.062
7	2-Aminobutan-4-olide	101.048	0.74	C4H7NO2	6.7	102.055	100.04
8	2-Deoxy-D-glucose	164.068	-2.07	C6H12O5	6.92	165.076	163.061
9	2-Ethylhexyl phthalate	278.152	-0.76	C16H22O4	4.3	279.159	277.145
10	2-hydroxyethyldisulfide	154.012	2.49	C4H10O2S2	5.83	155.019	153.005
11	2-Hydroxyglutarate	148.037	1.21	C5H8O5	10.96	149.044	147.03
12	2-Methylcitrate	206.043	0.42	C7H10O7	11.65	207.05	205.035
13	2-Oxoadipate	160.037	1.03	C6H8O5	10.74	161.044	159.03
14	2-Oxobutanoate	102.032	1.78	C4H6O3	6.81	103.039	101.024
15	2-Oxoglutarate	146.022	1.19	C5H6O5	11.14	147.029	145.014
16	3-(3-Hydroxy-phenyl)-propanoic acid	166.063	1.06	C9H10O3	7.55	167.07	165.056
17	3-(4-Hydroxyphenyl)pyruvate	180.042	1.48	C9H8O4	7.55	181.05	179.035
18	3,4-Dihydroxymandelate	184.037	0.72	C8H8O5	11.26	185.044	183.03
19	3,4-Dihydroxyphenylacetate	168.042	0.68	C8H8O4	9.27	169.05	167.035
20	3',5'-Cyclic AMP	329.053	0.6	C10H12N5O6P	8.53	330.06	328.045
21	3',5'-Cyclic GMP	345.047	0.28	C10H12N5O7P	9.15	346.055	344.04
22	3alpha, 7alpha-Dihydroxy-5beta-cholan-24-oic Acid	392.293	0.9	C24H40O4	5.48	393.3	391.285
23	3alpha,12alpha-Dihydroxy-5beta-cholan-24-oic Acid	392.293	0.75	C24H40O4	5.45	393.3	391.285
24	3-Hydroxyphenylacetate	152.047	1.02	C8H8O3	8.38	153.055	151.04
25	3-Methoxy-4-hydroxymandelate	198.053	0.24	C9H10O5	8.28	199.06	197.046
26	3-Methoxy-4-Hydroxyphenylglycolsulfate	264.03	0.02	C9H12O7S	8.38	265.038	263.023
27	3-Methoxytyramine	167.095	0.23	C9H13NO2	11.88	168.102	166.087
28	3-Methyl-2-oxobutanoic acid	116.047	1.94	C5H8O3	6.04	117.055	115.04
29	3-Phospho-D-glycerate	185.993	0.79	C3H7O7P	11.57	187	184.986
30	4-Aminobenzoate	165.079	0.7	C7H7NO2	9.13	166.086	164.072
31	4-Aminobutanoate	103.063	2.11	C4H9NO2	11.18	104.071	102.056
32	4-Aminohippuricacid	194.069	-0.33	C9H10N2O3	8.51	195.076	193.062
33	4-Coumarate	164.047	0.76	C9H8O3	8.03	165.055	163.04
34	4-Hydroxybutanoic acid	104.047	1.95	C4H8O3	10.96	105.055	103.04
35	4-Hydroxyphenylacetate	152.047	0.62	C8H8O3	7.99	153.055	151.04
36	4-Trimethylammoniobutanoate	145.11	-0.43	C7H15NO2	10.07	146.118	144.103
37	5-Aminolevulinate	131.058	-0.22	C5H9NO3	10.17	132.066	130.051
38	5-Hydroxyindoleacetate	191.058	2.48	C10H9NO3	9.28	192.066	190.051
39	5-Methoxytryptamine	190.111	-0.56	C11H14N2O	12.81	191.118	189.103
40	5'-Methylthioadenosine	297.09	-0.94	C11H15N5O3S	6.82	298.097	296.082
41	5-Oxoproline	129.043	1.73	C5H7NO3	8.77	130.05	128.035
42	6-Phospho-D-gluconate	276.025	0.25	C6H13O10P	11.82	277.032	275.017
43	Acetoin	88.0524	0.68	C4H8O2	5.19	89.0597	87.0452
44	Acetyl-CoA	809.126	2.16	C23H38N7O17P3S	9.25	810.133	808.119
45	Acetylcysteine	163.03	1.25	C5H9NO3S	7.59	164.038	162.023
46	Adenine	135.054	0.19	C5H5N5	8.64	136.062	134.047
47	Adenosine	267.097	-1.24	C10H13N5O4	8.25	268.104	266.089
48	ADP	427.029	0.97	C10H15N5O10P2	10.84	428.037	426.022
49	Adrenaline	183.09	-0.68	C9H13NO3	14.26	184.097	182.082
50	Alanine	89.0477	0.25	C3H7NO2	10.92	90.055	88.0404
51	Allantoin	158.044	0.77	C4H6N4O3	10.82	159.051	157.037
52	Alpha-Hydroxyisobutyricacid	104.047	2.39	C4H8O3	7.55	105.055	103.04
53	AMP	347.063	0.64	C10H14N5O7P	10.32	348.07	346.056
54	Arginine	174.112	-0.14	C6H14N4O2	14.54	175.119	173.104
55	Ascorbate	176.032	0.96	C6H8O6	9.16	177.039	175.025
56	Asparagine	132.053	-0.18	C4H8N2O3	11.09	133.061	131.046
57	Aspartate	133.038	1.48	C4H7NO4	11.06	134.045	132.03
58	Benzoate	122.037	1.51	C7H6O2	6.77	123.044	121.03
59	Betaine	117.079	-0.49	C5H11NO2	9.19	118.086	116.072
60	Biopterin	237.086	-0.79	C9H11N5O3	9.54	238.093	236.079
61	Biotin	244.088	-0.25	C10H16N2O3S	8.15	245.095	243.081
62	Carnitine	161.105	-0.74	C7H15NO3	10.05	162.112	160.098
63	CDP	403.018	0.81	C9H15N3O11P2	11.6	404.025	402.011
64	Choline phosphate	183.066	-0.1	C5H14NO4P	10.91	184.073	182.059
65	citrate	192.027	1.3	C6H8O7	12.03	193.034	191.02
66	Citrulline	175.096	0.93	C6H13N3O3	11.32	176.103	174.088
67	CMP	323.052	0.32	C9H14N3O8P	11.22	324.059	322.045
68	Creatine	131.069	-0.13	C4H9N3O2	10.91	132.077	130.062
69	Creatinine	113.059	-0.43	C4H7N3O	8.58	114.066	112.052
70	CTP	482.985	0.63	C9H16N3O14P3	12.13	483.992	481.977
71	Cystathionine	222.067	-0.6	C7H14N2O4S	11.76	223.075	221.06
72	Cysteate	169.005	0.86	C3H7NO5S	11.41	170.012	167.997
73	Cysteine	121.02	-0.33	C3H7NO2S	11.33	122.027	120.012
74	Cystine	240.024	-0.81	C6H12N2O4S2	11.42	241.031	239.017
75	Cytidine	243.086	-0.85	C9H13N3O5	9.72	244.093	242.078
76	Cytosine	111.043	-0.42	C4H5N3O	9.52	112.051	110.036
77	dAMP	331.068	-1.03	C10H14N5O6P	9.87	332.075	330.061
78	D-Arabinose	150.053	0.52	C5H10O5	10.27	151.06	149.046
79	Dehydroascorbate	174.016	1.02	C6H6O6	10.1	175.024	173.009
80	Deoxyadenosine	251.102	-1.33	C10H13N5O3	7.76	252.109	250.095
81	Deoxyguanosine	267.097	-0.9	C10H13N5O4	9.38	268.104	266.089
82	Deoxyuridine	228.075	-0.28	C9H12N2O5	7.76	229.082	227.067
83	dGMP	347.063	-1.19	C10H14N5O7P	11.17	348.07	346.056
84	dIMP	332.052	0.69	C10H13N4O7P	10.6	333.059	331.045
85	dUMP	308.041	0.75	C9H13N2O8P	10.32	309.048	307.034
86	Erythrose	120.042	1.66	C4H8O4	9.71	121.05	119.035
87	Erythrose 4-phosphate	200.009	0.92	C4H9O7P	11.49	201.016	199.001
88	Ethanolamine phosphate	141.019	1.8	C2H8NO4P	11.46	142.026	140.012
89	FAD	785.157	-0.75	C27H33N9O15P2	9.2	786.164	784.15
90	FMN	456.105	0.36	C17H21N4O9P	9.38	457.112	455.097
91	Folate	441.14	0.51	C19H19N7O6	11.39	442.147	440.132
92	Fructose	180.063	1.42	C6H12O6	10.36	181.071	179.056
93	Fructose 1,6-bisphosphate	339.996	0.35	C6H14O12P2	11.86	341.003	338.989
94	Fructose 6-phosphate	260.03	0.43	C6H13O9P	11.33	261.037	259.022
95	Fumarate	116.011	1.69	C4H4O4	11.34	117.018	115.004
96	Galactarate	210.038	0.58	C6H10O8	11.81	211.045	209.03
97	Galactose	180.063	0.74	C6H12O6	10.95	181.071	179.056
98	Galacturonate	194.043	0.84	C6H10O7	11.62	195.05	193.035
99	Gallate	170.022	2.56	C7H6O5	11.87	171.029	169.014
100	GDP	443.024	0.84	C10H15N5O11P2	11.99	444.032	442.017
101	Gluconic acid	196.058	0.62	C6H12O7	9.74	197.066	195.051
102	Glucosamine	179.079	-0.39	C6H13NO5	10.77	180.087	178.072
103	Glucosamine 6-phosphate	259.046	-0.47	C6H14NO8P	11.48	260.053	258.038
104	Glucose	180.063	1.17	C6H12O6	10.9	181.071	179.056
105	glucose 6-phosphate	260.03	-0.87	C6H13O9P	11.7	261.037	259.022
106	Glutamate	147.053	1.48	C5H9NO4	10.86	148.06	146.046
107	Glutamine	146.069	-0.33	C5H10N2O3	10.99	147.076	145.062
108	Glutarate	132.042	1.68	C5H8O4	10.7	133.05	131.035
109	Glutathione	307.084	-1.64	C10H17N3O6S	10.59	308.091	306.077
110	Glutathione disulfide	612.152	-0.29	C20H32N6O12S2	11.63	613.159	611.145
111	Glyceraldehyde	90.0317	1.85	C3H6O3	5.91	91.039	89.0244
112	Glyceraldehyde 3-phosphate	169.998	1.21	C3H7O6P	10.83	171.005	168.991
113	Glycerate	106.027	1.75	C3H6O4	9.61	107.034	105.019
114	Glycerol	92.0473	2.04	C3H8O3	8.85	93.0546	91.0401
115	Glycine	75.032	0.12	C2H5NO2	11.37	76.0393	74.0248
116	Glycolate	76.016	0.09	C2H4O3	6.56	77.0233	75.0088
117	Glycylglycine	132.053	1.42	C4H8N2O3	10.42	133.061	131.046
118	GMP	363.058	1.26	C10H14N5O8P	11.67	364.065	362.051
119	GTP	522.991	0.15	C10H16N5O14P3	12.56	523.998	521.983
120	Guanidinoacetate	117.054	-0.77	C3H7N3O2	11.55	118.061	116.047
121	Guanine	151.049	0	C5H5N5O	10.18	152.057	150.042
122	Guanosine	283.092	-0.78	C10H13N5O5	10.17	284.099	282.084
123	Gulono-1,4-lactone	178.048	1.24	C6H10O6	10.32	179.055	177.04
124	HEPES	238.099	-1.09	C8H18N2O4S	8.66	239.106	237.091
125	Hexanoylcarnitine	259.178	-0.69	C13H25NO4	7.15	260.186	258.171
126	Hippurate	179.058	0.59	C9H9NO3	6.77	180.066	178.051
127	Histidine	155.069	2.64	C6H9N3O2	10.98	156.077	154.062
128	Homocysteine	135.035	0.7	C4H9NO2S	11.4	136.043	134.028
129	Homocystine	268.055	0.84	C8H16N2O4S2	11.41	269.062	267.048
130	Homoserine	119.058	-0.43	C4H9NO3	11.01	120.066	118.051
131	homovanillate	182.058	0.32	C9H10O4	7.94	183.065	181.051
132	Hypoxanthine	136.039	0.14	C5H4N4O	9.04	137.046	135.031
133	IDP	428.013	0.67	C10H14N4O11P2	11.49	429.021	427.006
134	Imidazole-4-acetate	126.043	-0.62	C5H6N2O2	9.5	127.05	125.036
135	IMP	348.047	0.45	C10H13N4O8P	11.07	349.054	347.04
136	Indoxylsulfate	213.01	1.45	C8H7NO4S	7.46	214.017	212.002
137	Inosine	268.081	-0.92	C10H12N4O5	9.26	269.088	267.073
138	Isoleucine	131.095	-0.52	C6H13NO2	9.27	132.102	130.087
139	Isonicotinic acid	123.032	1.61	C6H5NO2	7.55	124.039	122.025
140	Itaconate	130.027	1.54	C5H6O4	10.84	131.034	129.019
141	Kynurenine	208.085	-0.21	C10H12N2O3	9.19	209.092	207.078
142	Lactic acid	90.0317	1.59	C3H6O3	8.42	91.039	89.0244
143	Leucine	131.095	0.06	C6H13NO2	9.04	132.102	130.087
144	Leucinic acid	132.079	0.91	C6H12O3	5.72	133.086	131.071
145	Lipoamide	205.06	-0.42	C8H15NOS2	5.34	206.067	204.052
146	Lipoate	206.044	0.35	C8H14O2S2	5.53	207.051	205.036
147	Lysine	146.106	-0.08	C6H14N2O2	14.02	147.113	145.098
148	Malate	134.022	1.42	C4H6O5	11.34	135.029	133.014
149	Maleic acid	116.011	1.88	C4H4O4	9.3	117.018	115.004
150	Malonate	104.011	2.25	C3H4O4	11.16	105.018	103.004
151	Mannitol	182.079	1.27	C6H14O6	10.51	183.086	181.072
152	Melatonin	232.121	-0.61	C13H16N2O2	5.05	233.128	231.114
153	Menadione	172.052	2.04	C11H8O2	4.71	173.06	171.045
154	Mercaptoethanol	78.0139	0.42	C2H6OS	5.88	79.0212	77.0067
155	Mesaconate	130.027	2.61	C5H6O4	11.14	131.034	129.019
156	meso-2,6-Diaminoheptanedioate	190.095	-0.41	C7H14N2O4	12.26	191.103	189.088
157	Methionine	149.051	0.46	C5H11NO2S	9.4	150.058	148.044
158	Methylglyoxal	72.0211	-0.4	C3H4O2	10.31	73.0284	71.0139
159	Methylguanidine	73.064	-2.16	C2H7N3	16.69	74.0712	72.0568
160	Methylmalonate	118.027	1.64	C4H6O4	10.7	119.034	117.019
161	MOPS	209.072	0.56	C7H15NO4S	7.01	210.079	208.065
162	myo-Inositol	180.063	1	C6H12O6	11.94	181.071	179.056
163	N(pi)-Methyl-L-histidine	169.085	-0.69	C7H11N3O2	9.91	170.092	168.078
164	N6-Acetyl-L-lysine	188.116	-0.25	C8H16N2O3	13.47	189.123	187.109
165	N6-Methyl-L-lysine	160.121	1.86	C7H16N2O2	13.52	161.128	159.114
166	N-Acetyl-D-glucosamine	221.09	0.68	C8H15NO6	9.71	222.097	220.083
167	N-Acetylglutamine	188.08	0.83	C7H12N2O4	8.85	189.087	187.072
168	N-Acetyl-L-glutamate	189.064	1.04	C7H11NO5	10.36	190.071	188.056
169	N-Acetyl-L-phenylalanine	207.09	-0.45	C11H13NO3	5.85	208.097	206.082
170	N-Acetylneuraminate	309.106	0.46	C11H19NO9	10.14	310.113	308.099
171	N-Acetylornithine	174.1	-0.3	C7H14N2O3	10.91	175.108	173.093
172	N-Acetylputrescine	130.111	0.35	C6H14N2O	12.22	131.118	129.103
173	NAD+	663.109	1.69	C21H27N7O14P2	10.47	664.116	662.102
174	NADH	665.125	1.28	C21H29N7O14P2	10	666.132	664.118
175	NADP+	743.075	2.55	C21H28N7O17P3	11.31	744.083	742.068
176	NADPH	745.091	2.26	C21H30N7O17P3	11.22	746.098	744.084
177	Ne Ne dimethyllysine	174.137	-0.44	C8H18N2O2	12.74	175.144	173.13
178	Nicotinamide	122.048	-1.85	C6H6N2O	7.02	123.055	121.041
179	Norleucine	131.095	0.5	C6H13NO2	9.01	132.102	130.087
180	Normetanephrine	183.09	0.15	C9H13NO3	10.77	184.097	182.082
181	O-Acetylcarnitine	203.116	-0.16	C9H17NO4	8.98	204.123	202.108
182	O-Acetyl-L-serine	147.053	-0.27	C5H9NO4	8.92	148.06	146.046
183	O-Butanoylcarnitine	231.147	-0.43	C11H21NO4	7.93	232.154	230.14
184	Octadecanoic acid	284.272	-0.44	C18H36O2	4.19	285.279	283.264
185	O-decanoyl-R-carnitine	315.241	-1.08	C17H33NO4	5.7	316.248	314.234
186	Ornithine	132.09	-0.01	C5H12N2O2	13.49	133.097	131.083
187	Orotate	156.017	1.16	C5H4N2O4	8.87	157.024	155.01
188	Orotidine	288.059	0.23	C10H12N2O8	9.82	289.067	287.052
189	Oxalate	89.9953	2.12	C2H2O4	12.15	91.0026	88.988
190	Oxaloacetate	132.006	3.14	C4H4O5	11.79	133.013	130.999
191	Pantothenate	219.111	0.27	C9H17NO5	7.93	220.118	218.103
192	Phenolsulfonphthalein	354.056	0.7	C19H14O5S	6.04	355.063	353.049
193	Phenylacetylglycine	193.074	1.13	C10H11NO3	6.36	194.081	192.067
194	Phenylalanine	165.079	0.02	C9H11NO2	10.77	166.086	164.072
195	Phenylhydrazine	108.069	0.3	C6H8N2	5.26	109.076	107.061
196	Phenylpyruvate	164.047	0.95	C9H8O3	5.35	165.055	163.04
197	Phosphoenolpyruvate	167.982	1.28	C3H5O6P	11.79	168.99	166.975
198	Picolinic acid	123.032	0.63	C6H5NO2	7.56	124.039	122.025
199	Proline	115.063	-0.61	C5H9NO2	10	116.071	114.056
200	pyrazinoate	124.027	2.26	C5H4N2O2	8.18	125.035	123.02
201	Pyridoxal phosphate	247.025	0.21	C8H10NO6P	11.56	248.032	246.017
202	Pyridoxine	169.074	0.93	C8H11NO3	7.55	170.081	168.067
203	Pyruvate	88.0161	0.78	C3H4O3	7.77	89.0233	87.0088
204	Rhamnose	164.068	0.34	C6H12O5	10.56	165.076	163.061
205	Ribose	150.053	0.72	C5H10O5	9.55	151.06	149.046
206	Ribose 5-phosphate	230.019	0.44	C5H11O8P	11.26	231.026	229.012
207	S-Adenosyl-L-homocysteine	384.122	-0.92	C14H20N6O5S	10.19	385.129	383.114
208	Salicyluric acid	195.053	0.09	C9H9NO4	6.96	196.06	194.046
209	Sarcosine	89.0477	1.25	C3H7NO2	7.93	90.055	88.0404
210	Selenomethionine	196.995	0.14	C5H11NO2Se	9.35	198.003	195.988
211	Serine	105.043	-0.18	C3H7NO3	11.38	106.05	104.035
212	Serotonin	176.095	0.48	C10H12N2O	17.24	177.102	175.088
213	sn-Glycero-3-Phosphocholine	257.103	-1.15	C8H20NO6P	10.44	258.11	256.096
214	sn-Glycerol 3-phosphate	172.014	0.96	C3H9O6P	10.9	173.021	171.006
215	Sorbitol 6-phosphate	262.045	0.21	C6H15O9P	11.32	263.053	261.038
216	Succinate	118.027	1.96	C4H6O4	10.96	119.034	117.019
217	Sucrose	342.116	0.13	C12H22O11	10.98	343.123	341.109
218	Taurine	125.015	1.58	C2H7NO3S	11.1	126.022	124.007
219	Taurocholate	515.292	-0.07	C26H45NO7S	5.45	516.299	514.284
220	Thiamin diphosphate	424.037	1.32	C12H18N4O7P2S	11.49	425.044	423.03
221	Threonine	119.058	2.37	C4H9NO3	10.74	120.066	118.051
222	Thymidine	242.09	0.69	C10H14N2O5	7.1	243.098	241.083
223	Thymine	126.043	1.35	C5H6N2O2	7.33	127.05	125.036
224	trans-Aconitate	174.016	0.67	C6H6O6	12.31	175.024	173.009
225	Tryptophan	204.09	-0.6	C11H12N2O2	9.65	205.097	203.083
226	Tyrosine	181.074	0.46	C9H11NO3	10.29	182.081	180.067
227	UDP-Glucose	566.055	0.95	C15H24N2O17P2	11.35	567.062	565.048
228	UMP	324.036	0.77	C9H13N2O9P	10.9	325.043	323.029
229	Uracil	112.027	1.13	C4H4N2O2	8.07	113.035	111.02
230	Urate	168.028	0.05	C5H4N4O3	10.13	169.036	167.021
231	Uridine	244.07	-0.14	C9H12N2O6	8.67	245.077	243.062
232	UTP	483.969	-0.21	C9H15N2O15P3	11.13	484.976	482.961
233	Valine	117.079	-0.75	C5H11NO2	9.85	118.086	116.072
234	Xanthine	152.033	1.04	C5H4N4O2	9.66	153.041	151.026
235	Xanthosine	284.076	-1.98	C10H12N4O6	9.86	285.083	283.068
**RT: retention time in minutes
*All authentic standards were prepared in different mixtures in 1:1 methanol:water and diluted 10 times with acetonitrile to give a final individual concentration of 20 µM for LC-HRMS analysis

## Sheet: Table S2 Identification
	Table S2 Identification of the metabolites detected in the spent media of the non-magnetosome, high magnetosome producing cells and FSM analysed with LC-MS
No	Metabolite	Formula	Monoisotopic mass (Da)	Mass error (ppm)	Retention time (RT) (min)	Retention time tolerance (min) for grouping	Retention time error (min)	Method of identification	Level of identification based on MSI protocol*	Flod change: (Magnetosome producing cells) / (Non-magnetosome producing cells)	Flod change: (Non-magnetosome producing cells) / (FSM)	Flod change: (Magnetosome producing cells) / (FSM)	Log2 Fold Change: (Magnetosome producing cells) / (Non-magnetosome producing cells)	Log2 Fold Change: (Non-magnetosome producing cells) / (FSM)	Log2 Fold Change: (Magnetosome producing cells) / (FSM)	P-value: (Magnetosome producing cells) / (Non-magnetosome producing cells)	P-value: (Non-magnetosome producing cells) / (FSM)	P-value: (Magnetosome producing cells) / (FSM)	Adj. P-value: (Magnetosome producing cells) / (Non-magnetosome producing cells)	Adj. P-value: (Non-magnetosome producing cells) / (FSM)	Adj. P-value: (Magnetosome producing cells) / (FSM)	OPLS-DA p(corr): Non-magnetosome producing cells vs High-magnetosome producing cells	OPLS-DA VIP: Non-magnetosome producing cells vs High-magnetosome producing cells	OPLS-DAp(corr): Non-magnetosome producing cells vs FSM	OPLS-DA VIP: Non-magnetosome producing cells vs FSM	OPLS-DA p(corr): High-magnetosome producing cells vs FSM	OPLS-DA VIP: High-magnetosome producing cells vs FSM	BioCyc Pathways
1	2,2-Dimethylsuccinic acid	C6 H10 O4	146.058	2.00278	5.275	0.112	0.103932	m/z, MS/MS	2	78.104	4.07	317.856	6.29	2.02	8.31	9.72e-12	3.49e-05	1e-15	2.98e-11	4.91e-05	3.2e-15	0.990386	1.09832	-0.743764	0.125445	-0.991192	0.992394
2	2-Hydroxy-2-methylbutyric acid	C5 H10 O3	118.063	2.285	5.075	0.5	0.011596	m/z, MS/MS	2	1.208	1.657	2.002	0.27	0.73	1	0.013667	2.42e-07	4.78e-09	0.016713	3.9e-07	9.08e-09	0.774986	0.593751	-0.933262	1.14279	-0.96063	1.02956
3	2-Hydroxyglutarate	C5 H8 O5	148.037	1.71	9.869	0.119	0.0625042	m/z, RT, MS/MS	1	3.6	18.443	66.39	1.85	4.21	6.05	7.53e-12	1e-15	1e-15	2.36e-11	2.97e-15	3.2e-15	0.989574	2.74468	-0.979803	1.98978	-0.995038	2.87017
4	2-Isopropylmalic acid	C7 H12 O5	176.069	1.74667	8.282	0.5	0.0399212	m/z, MS/MS	2	6.894	29.533	203.613	2.79	4.88	7.67	1e-15	1e-15	1e-15	3.82e-15	2.97e-15	3.2e-15	0.990761	2.62881	-0.996892	1.29417	-0.99235	2.54542
5	2-Oxoadipate	C6 H8 O5	160.037	1.53722	9.733	0.5	0.0101238	m/z, RT	1	5.676	2	11.353	2.5	1	3.51	3.96e-10	3.76e-05	2.84e-12	9.38e-10	5.28e-05	8.13e-12	0.992301	0.286004	-0.840521	0.107861	-0.996465	0.270691
6	2-Oxoglutarate	C5 H6 O5	146.022	1.53722	10.311	0.5	0.0117057	m/z, RT, MS/MS	1	0.12	6.071	0.73	-3.06	2.6	-0.45	1e-15	1e-15	2.89e-05	3.82e-15	2.97e-15	4.04e-05	-0.989043	0.661731	-0.986347	0.792074	0.873093	0.129796	Other
7	3',5'-Cyclic AMP	C10 H12 N5 O6 P	329.053	0.6325	7.333	0.5	0.107491	m/z, RT	1	33.07	0.791	26.158	5.05	-0.34	4.71	1e-15	0.107553	1e-15	3.82e-15	0.123999	3.2e-15	0.993666	0.876396	0.526303	0.0784889	-0.993372	0.783014
8	3',5'-Cyclic GMP	C10 H12 N5 O7 P	345.048	0.830833	9.07	0.5	0.0227204	m/z, RT	1	233.587	0.04	9.249	7.87	-4.66	3.21	1e-15	1e-15	1e-15	3.82e-15	2.97e-15	3.2e-15	0.993148	0.776628	0.991098	0.309532	-0.99024	0.659217
9	3-Hydroxy-3-methylglutaric acid	C6 H10 O5	162.053	1.70111	9.386	0.5	0.0164516	m/z, MS/MS	2	0.542	1.162	0.629	-0.88	0.22	-0.67	2.45e-07	0.030452	1.87e-05	4.31e-07	0.036577	2.65e-05	-0.945955	0.422623	-0.75148	0.279032	0.858917	0.291278
10	3-Methy2-oxobutanoic acid	C5 H8 O3	116.048	2.00722	4.797	0.5	0.00984028	m/z, RT, MS/MS	1	37.066	4.757	176.312	5.21	2.25	7.46	1e-15	1.57e-14	1e-15	3.82e-15	4.65e-14	3.2e-15	0.993819	1.87081	-0.986595	0.344933	-0.993115	1.69951	tRNA charging;Other
11	3-Phenyllactic acid	C9 H10 O3	166.063	1.13111	4.715	0.5	0.0146553	m/z, MS/MS	2	5.306	4.339	23.027	2.41	2.12	4.53	1e-15	1e-15	1e-15	3.82e-15	2.97e-15	3.2e-15	0.989981	1.22618	-0.98131	0.630731	-0.992164	1.19589
12	3-Ureidopropionic acid	C4 H8 N2 O3	132.054	0.951667	8.64	0.5	0.13759	m/z, MS/MS	2	0.008	199.22	1.617	-6.94	7.64	0.69	1e-15	1e-15	0.00039	3.82e-15	2.97e-15	0.000511	-0.994912	1.37712	-0.994514	1.69882	-0.783069	0.0643815	Other
13	4-Aminobutanoate	C4 H9 N O2	103.064	0.276111	10.996	0.5	0.0275107	m/z, RT	1	0.385	5.217	2.009	-1.38	2.38	1.01	5.26e-10	1e-15	1.47e-07	1.23e-09	2.97e-15	2.44e-07	-0.977185	0.15365	-0.98594	0.214793	-0.938327	0.0711571	Other
14	4-Aminohippuricacid	C9 H10 N2 O3	194.069	0.624444	7.429	0.5	0.0390581	m/z, RT	1	23.127	0.053	1.217	4.53	-4.25	0.28	1e-15	1e-15	0.016397	3.82e-15	2.97e-15	0.019797	0.994957	1.94446	0.99352	2.12362	-0.822267	0.725473	glycolysis III (from glucose);myo-inositol biosynthesis;Other
15	4-Guanidinobutyric acid	C5 H11 N3 O2	145.085	0.357778	10.995	0.5	0.0199456	m/z, MS/MS	2	0.384	2.427	0.932	-1.38	1.28	-0.1	5.67e-11	2.21e-10	0.277807	1.51e-10	4.66e-10	0.309131	-0.97686	1.06161	-0.970967	1.26672	0.425172	0.150592
16	4-Hydroxy-proline	C5 H9 N O3	131.058	0.433333	10.599	0.5	0.0160186	m/z, MS/MS	2	0.096	17.159	1.641	-3.39	4.1	0.71	1e-15	1e-15	7.56e-09	3.82e-15	2.97e-15	1.41e-08	-0.994685	0.909167	-0.99487	1.14504	-0.951114	0.169937	L-proline biosynthesis I;Other
17	4-Oxoproline	C5 H7 N O3	129.043	1.83222	7.311	0.5	0.0430418	m/z, MS/MS	2	0.158	1.061	0.167	-2.67	0.09	-2.58	3.99e-07	0.40776	2.76e-06	6.89e-07	0.444449	4.1e-06	-0.876838	1.77903	-0.35239	0.753826	0.882961	1.37634
18	4-tert-Octylphenol	C14 H22 O	206.167	0.74	21.538	0.5	0.0957089	m/z, MS/MS	2	0.939	0.938	0.88	-0.09	-0.09	-0.18	0.701128	0.221329	0.053826	0.74234	0.247904	0.063109	-0.190799	0.139465	0.520118	0.404044	0.571824	0.36623	Other
19	5-Aminolevulinate	C5 H9 N O3	131.058	0.6675	9.273	0.142	0.0532405	m/z, RT	1	6.734	9.126	61.455	2.75	3.19	5.94	3.98e-11	3.79e-12	1e-15	1.1e-10	9.85e-12	3.2e-15	0.995867	0.787568	-0.992374	0.379726	-0.996996	0.760338	Other
20	5-Oxoproline	C5 H7 N O3	129.043	2.00611	7.828	0.103	0.054267	m/z, RT, MS/MS	1	0.398	5.158	2.055	-1.33	2.37	1.04	6.47e-09	7.55e-13	7.55e-08	1.32e-08	2.13e-12	1.29e-07	-0.990949	3.5433	-0.99179	5.06329	-0.9662	1.84839	Other
21	6-Hydroxycaproic acid	C6 H12 O3	132.079	1.00867	4.257	0.109	0.0411234	m/z, MS/MS	2	33.731	0.479	16.146	5.08	-1.06	4.01	1e-15	1.72e-09	1e-15	3.82e-15	3.32e-09	3.2e-15	0.992739	0.377709	0.975985	0.0831748	-0.992487	0.333607	Other
22	Acetoin	C4 H8 O2	88.0526	1.47611	5.14	0.5	0.0512182	m/z, RT, MS/MS	1	202.824	0.431	87.365	7.66	-1.22	6.45	1e-15	1.22e-06	1e-15	3.82e-15	1.88e-06	3.2e-15	0.964326	1.7471	0.915644	0.169084	-0.959966	1.56378	tRNA charging;superpathway of branched chain amino acid biosynthesis;Other
23	Adenine	C5 H5 N5	135.055	0.727222	8.444	0.12	0.00802139	m/z, RT, MS/MS	1	0.679	10.094	6.849	-0.56	3.34	2.78	1.19e-08	1e-15	1e-15	2.37e-08	2.97e-15	3.2e-15	-0.950366	2.13348	-0.990909	4.40545	-0.996252	2.55324	Other
24	Adenosine	C10 H13 N5 O4	267.097	0.499444	8.088	0.5	0.0357439	m/z, RT, MS/MS	1	3.237	0.088	0.285	1.69	-3.51	-1.81	1.21e-06	1.42e-11	4.17e-08	2e-06	3.4e-11	7.28e-08	0.869703	0.901439	0.993439	2.71347	0.992723	1.77904
25	Alanine	C3 H7 N O2	89.0477	0.298333	10.747	0.5	0.0163557	m/z, RT, MS/MS	1	11.444	0.327	3.743	3.52	-1.61	1.9	1e-15	1e-15	1e-15	3.82e-15	2.97e-15	3.2e-15	0.996571	4.2306	0.987591	2.33861	-0.991731	3.38485	Other
26	Aminoisobutyric acid	C4 H9 N O2	103.064	0.220556	10.057	0.5	0.0657008	m/z, MS/MS	2	0.645	0.949	0.612	-0.63	-0.08	-0.71	0.031946	0.999391	0.034068	0.038246	0.999988	0.04052	-0.608886	0.41306	0.0137422	0.00621026	0.591537	0.362192	tRNA charging;superpathway of branched chain amino acid biosynthesis;superpathway of L-methionine biosynthesis (by sulfhydrylation);L-methionine biosynthesis III;L-homocysteine biosynthesis;superpathway of L-isoleucine biosynthesis I;Other
27	AMP	C10 H14 N5 O7 P	347.063	0.441667	9.22	0.103	0.0154782	m/z, RT, MS/MS	1	554.798	0.026	14.247	9.12	-5.28	3.83	1e-15	1e-15	1e-15	3.82e-15	2.97e-15	3.2e-15	0.996207	1.17274	0.976775	0.362896	-0.995181	1.01843
28	Arabinose	C5 H10 O5	150.053	1.24	8.505	0.096	0.0201492	m/z, MS/MS	2	1.351	0.366	0.495	0.43	-1.45	-1.01	1.39e-05	3.68e-13	1.2e-10	2.1e-05	1.06e-12	2.67e-10	0.909956	0.249695	0.993326	0.725001	0.978993	0.470695
29	Arginine	C6 H14 N4 O2	174.112	0.202222	17.153	0.5	0.0208922	m/z, RT, MS/MS	1	5.626	0.173	0.971	2.49	-2.53	-0.04	1e-15	1e-15	0.886413	3.82e-15	2.97e-15	0.917276	0.993535	4.2731	0.985784	5.33731	0.154323	0.283029	Other
30	Asparagine	C4 H8 N2 O3	132.054	0.246667	10.788	0.5	0.0166793	m/z, RT, MS/MS	1	1.189	0.4	0.475	0.25	-1.32	-1.07	0.004477	8.81e-12	1.63e-10	0.005698	2.17e-11	3.6e-10	0.831442	0.359984	0.98325	1.36886	0.968719	0.927725	Other
31	Aspartate	C4 H7 N O4	133.038	1.83111	10.196	0.5	0.0119962	m/z, RT, MS/MS	1	1.065	0.382	0.407	0.09	-1.39	-1.3	0.707962	2.7e-10	5.76e-10	0.748676	5.64e-10	1.2e-09	0.276907	0.0878057	0.982936	1.21254	0.974074	0.869356	Other
32	Benzoate	C7 H6 O2	122.037	2.37111	5.265	0.071	0.137273	m/z, RT	1	8.396	1.21	10.156	3.07	0.27	3.34	0.001601	0.28835	8.08e-05	0.002101	0.319611	0.00011	0.859951	0.515897	-0.331637	0.186052	-0.957477	0.537278
33	Betaine	C5 H11 N O2	117.079	0.433889	8.953	0.5	0.0088757	m/z, RT, MS/MS	1	1.346	2.647	3.562	0.43	1.4	1.83	1.12e-07	1e-15	1e-15	2.01e-07	2.97e-15	3.2e-15	0.970407	4.05838	-0.988672	6.51881	-0.995644	6.02971	Other
34	Biotin	C10 H16 N2 O3 S	244.088	1.45611	7.043	0.5	0.0629414	m/z, RT	1	4.09	0.15	0.613	2.03	-2.74	-0.71	1.2e-07	1.81e-09	0.006151	2.16e-07	3.48e-09	0.007563	0.93537	0.222207	0.959019	0.381489	0.806551	0.177041
35	Carnitine	C7 H15 N O3	161.105	0.474444	9.788	0.5	0.00909889	m/z, RT	1	0.631	1.562	0.985	-0.66	0.64	-0.02	2.89e-07	1.82e-07	0.937255	5.05e-07	2.96e-07	0.965199	-0.950742	0.194975	-0.952112	0.244492	-0.104239	0.00988096
36	Choline	C5 H13 N O	103.1	0.490556	15.733	0.5	0.0196568	m/z, MS/MS	2	0.672	1.192	0.8	-0.57	0.25	-0.32	0.000103	0.024413	0.033775	0.000146	0.029489	0.040209	-0.876389	3.11565	-0.688066	2.56099	0.601594	1.53845	superpathway of branched chain amino acid biosynthesis;superpathway of L-isoleucine biosynthesis I;L-isoleucine biosynthesis I (from threonine);L-arginine biosynthesis I (via L-ornithine);L-arginine biosynthesis II (acetyl cycle);L-ornithine biosynthesis I;Other
37	Choline phosphate	C5 H14 N O4 P	183.066	0.471667	10.014	0.5	0.00740124	m/z, RT	1	0.729	1.024	0.746	-0.46	0.03	-0.42	0.00071	0.786988	0.002636	0.000952	0.820368	0.0033	-0.832735	0.196108	-0.173044	0.0465133	0.762183	0.153544	Other
38	Citraconic acid	C5 H6 O4	130.027	2.38722	11.933	0.5	0.015356	m/z, MS/MS	2	0.617	1.139	0.703	-0.7	0.19	-0.51	2.65e-06	0.119566	9.28e-05	4.28e-06	0.137353	0.000126	-0.932136	0.209757	-0.545392	0.111256	0.836907	0.147312	superpathway of branched chain amino acid biosynthesis;superpathway of L-isoleucine biosynthesis I;L-isoleucine biosynthesis I (from threonine);glycolysis III (from glucose);Other
39	Citric acid	C6 H8 O7	192.027	1.31556	11.615	0.102	0.0350346	m/z, MS/MS	2	5.069	0.016	0.079	2.34	-6.01	-3.67	1.57e-10	1e-15	1e-15	3.91e-10	2.97e-15	3.2e-15	0.95573	0.992217	0.996136	5.11266	0.994174	3.61489	L-proline biosynthesis I;Other
40	Citrulline	C6 H13 N3 O3	175.096	0.295	11.082	0.5	0.00912172	m/z, RT, MS/MS	1	7.992	10.361	82.809	3	3.37	6.37	1e-15	1e-15	1e-15	3.82e-15	2.97e-15	3.2e-15	0.995191	3.93154	-0.990134	1.73917	-0.995489	3.75493
41	CMP	C9 H14 N3 O8 P	323.052	0.8375	10.123	0.5	0.0104829	m/z, RT	1	276.439	0.114	31.488	8.11	-3.13	4.98	1e-15	1e-15	1e-15	3.82e-15	2.97e-15	3.2e-15	0.993758	0.678501	0.982394	0.141227	-0.992847	0.600405
42	Crotonic acid	C4 H6 O2	86.0369	1.87	5.224	0.5	0.0526416	m/z, MS/MS	2	58.693	1.232	72.282	5.88	0.3	6.18	1e-15	0.036371	1e-15	3.82e-15	0.043481	3.2e-15	0.99075	1.0874	-0.622248	0.0665523	-0.992063	0.978697	tRNA charging;superpathway of branched chain amino acid biosynthesis;superpathway of L-isoleucine biosynthesis I;Other
43	Cytidine	C9 H13 N3 O5	243.085	0.218889	9.524	0.5	0.00731862	m/z, RT	1	1.55	5.38	8.339	0.63	2.43	3.06	8.36e-08	1e-15	1e-15	1.53e-07	2.97e-15	3.2e-15	0.965324	0.596973	-0.993479	0.913801	-0.994343	0.86105
44	Cytosine	C4 H5 N3 O	111.043	0.225	9.37	0.5	0.00926407	m/z, RT, MS/MS	1	7.371	4.116	30.339	2.88	2.04	4.92	1e-15	1e-15	1e-15	3.82e-15	2.97e-15	3.2e-15	0.994187	1.99528	-0.979209	0.857614	-0.994713	1.90079	superpathway of branched chain amino acid biosynthesis;phosphopantothenate biosynthesis I;Other
45	dAMP	C10 H14 N5 O6 P	331.068	0.388333	8.699	0.5	0.00898115	m/z, RT	1	177.931	1.083	192.621	7.48	0.11	7.59	1e-15	0.252785	1e-15	3.82e-15	0.281288	3.2e-15	0.996528	0.566864	-0.429997	0.00921852	-0.996317	0.509269
46	dGMP	C10 H14 N5 O7 P	347.063	0.886667	10.265	0.5	0.0163527	m/z, RT	1	68.005	1.24	84.338	6.09	0.31	6.4	1e-15	0.001442	1e-15	3.82e-15	0.001869	3.2e-15	0.993622	0.204622	-0.881494	0.0126858	-0.992899	0.184058
47	Ethyl myristate	C16 H32 O2	256.24	0.96	3.708	0.5	0.0156102	m/z, MS/MS	2	3.89	1.253	4.874	1.96	0.33	2.29	0.000399	0.759001	0.000105	0.000544	0.793459	0.000142	0.935518	0.461924	-0.0783103	0.0352356	-0.94078	0.420116
48	Fructose	C6 H12 O6	180.064	1.36611	8.495	0.115	0.0722071	m/z, RT, MS/MS	1	0.527	1.116	0.588	-0.93	0.16	-0.77	5.34e-09	0.202228	4.22e-08	1.09e-08	0.227306	7.36e-08	-0.967439	0.341084	-0.486057	0.129704	0.947038	0.272878	L-arginine biosynthesis I (via L-ornithine);L-arginine biosynthesis II (acetyl cycle);phosphopantothenate biosynthesis I;aminomethylphosphonate degradation;Other
49	Galactarate	C6 H10 O8	210.038	1.07167	10.985	0.5	0.0150237	m/z, RT, MS/MS	1	0.127	0.656	0.083	-2.98	-0.61	-3.59	2.1e-10	0.03851	2.3e-11	5.12e-10	0.045932	5.67e-11	-0.954192	0.71407	0.709448	0.519024	0.963725	0.782985	Other
50	Galactose	C6 H12 O6	180.064	1.495	10.864	0.5	0.0149472	m/z, RT	1	8.527	0.592	5.05	3.09	-0.76	2.34	1e-15	1.07e-07	1e-15	3.82e-15	1.77e-07	3.2e-15	0.97872	0.407613	0.979437	0.157371	-0.969766	0.346713	tRNA charging;L-arginine biosynthesis I (via L-ornithine);L-arginine biosynthesis II (acetyl cycle);Other
51	Genistein	C15 H10 O5	270.053	0.707778	5.101	0.115	0.0258668	m/z, MS/MS	2	0.312	47.424	14.816	-1.68	5.57	3.89	4.65e-06	1e-15	3.81e-11	7.32e-06	2.97e-15	9.14e-11	-0.879534	0.677136	-0.949412	1.03542	-0.932402	0.416475
52	Gluconic acid	C6 H12 O7	196.059	0.963333	9.839	0.147	0.0834256	m/z, RT, MS/MS	1	0.311	2.601	0.809	-1.68	1.38	-0.31	1e-15	1.04e-12	0.001278	3.82e-15	2.9e-12	0.00163	-0.984838	1.34878	-0.98128	1.58048	0.800869	0.338577	glycolysis III (from glucose);myo-inositol biosynthesis;Other
53	Glucosamine	C6 H13 N O5	179.079	0.270556	10.813	0.5	0.0199965	m/z, RT	1	3.605	0.113	0.408	1.85	-3.14	-1.29	1.9e-09	5.87e-13	2.68e-07	4.13e-09	1.67e-12	4.32e-07	0.939111	0.261124	0.994566	0.572041	0.962172	0.334314
54	glucose 6-phosphate	C6 H13 O9 P	260.03	0.2975	10.943	0.5	0.0116593	m/z, RT	1	3.284	22.881	75.141	1.72	4.52	6.23	1.58e-10	1e-15	1e-15	3.92e-10	2.97e-15	3.2e-15	0.982534	0.270946	-0.986238	0.21461	-0.991612	0.290486	tRNA charging;Other
55	Glutamate	C5 H9 N O4	147.053	0.25	9.922	0.5	0.0116595	m/z, RT, MS/MS	1	0.113	0.714	0.08	-3.15	-0.49	-3.64	1e-15	2.03e-06	1e-15	3.82e-15	3.1e-06	3.2e-15	-0.991989	2.28401	0.944582	1.7687	0.992782	2.44553
56	Glutamine	C5 H10 N2 O3	146.069	0.376667	8.494	0.1	0.0235014	m/z, RT, MS/MS	1	2.696	0.064	0.171	1.43	-3.98	-2.54	1e-15	1e-15	1e-15	3.82e-15	2.97e-15	3.2e-15	0.995459	0.473082	0.995607	1.76981	0.994242	1.21773
57	Glutarate	C5 H8 O4	132.042	1.89389	9.463	0.5	0.0206309	m/z, RT	1	4.28	4.109	17.586	2.1	2.04	4.14	5.77e-11	6.16e-11	1e-15	1.53e-10	1.37e-10	3.2e-15	0.981105	0.269933	-0.98063	0.159528	-0.987353	0.269818	Other
58	Glyceraldehyde	C3 H6 O3	90.0318	1.84667	7.046	0.145	0.0805893	m/z, RT, MS/MS	1	3.357	0.751	2.52	1.75	-0.41	1.33	0.258118	0.597189	0.047013	0.287347	0.634684	0.055376	0.523994	5.94539	-0.257428	3.85844	-0.916156	8.64929	Other
59	Glycerate	C3 H6 O4	106.027	2.03833	8.545	0.5	0.0242366	m/z, RT, MS/MS	1	3.677	0.444	1.632	1.88	-1.17	0.71	1e-15	1.12e-10	3.19e-07	3.82e-15	2.41e-10	5.13e-07	0.987648	0.741012	0.984315	0.633943	-0.935876	0.465049	tRNA charging;superpathway of branched chain amino acid biosynthesis;superpathway of L-isoleucine biosynthesis I;Other
60	Glycerol	C3 H8 O3	92.0475	1.81556	8.682	0.5	0.00716595	m/z, RT	1	1.015	50.479	51.245	0.02	5.66	5.68	0.950365	1e-15	1e-15	0.968554	2.97e-15	3.2e-15	0.197322	0.0581403	-0.987495	0.988451	-0.984906	0.731106
61	Glycine	C2 H5 N O2	75.0321	0.828889	11.209	0.5	0.0176467	m/z, RT	1	4.722	0.181	0.853	2.24	-2.47	-0.23	1e-15	1e-15	0.007781	3.82e-15	2.97e-15	0.009534	0.99165	0.724462	0.992516	0.995607	0.734539	0.277984	tRNA charging;superpathway of branched chain amino acid biosynthesis;superpathway of L-methionine biosynthesis (by sulfhydrylation);L-methionine biosynthesis III;L-homocysteine biosynthesis;superpathway of L-isoleucine biosynthesis I;Other
62	Glycyleucine	C8 H16 N2 O3	188.116	0.302222	6.996	0.5	0.0425525	m/z, MS/MS	2	0.769	0.049	0.037	-0.38	-4.36	-4.74	0.004673	1e-15	1e-15	0.005942	2.97e-15	3.2e-15	-0.802747	0.21884	0.982934	2.7145	0.97961	1.99183	Other
63	Guanidinoacetate	C3 H7 N3 O2	117.054	0.220556	11.431	0.5	0.0112388	m/z, RT	1	3.548	1.755	6.228	1.83	0.81	2.64	1e-15	2.16e-08	1e-15	3.82e-15	3.78e-08	3.2e-15	0.991245	0.317307	-0.95966	0.16185	-0.992841	0.309422	glycolysis III (from glucose);myo-inositol biosynthesis;Other
64	Guanine	C5 H5 N5 O	151.049	0.421111	10.059	0.5	0.0123396	m/z, RT	1	142.588	0.121	17.262	7.16	-3.05	4.11	1e-15	1e-15	1e-15	3.82e-15	2.97e-15	3.2e-15	0.994888	1.50457	0.997734	0.420881	-0.995923	1.31593
65	Guanosine	C10 H13 N5 O5	283.092	0.699444	9.994	0.5	0.0146174	m/z, RT	1	35.247	0.091	3.216	5.14	-3.45	1.69	1e-15	1e-15	4.12e-12	3.82e-15	2.97e-15	1.15e-11	0.994507	0.621446	0.99085	0.416535	-0.98761	0.466191
66	Hexadecanamide	C16 H33 N O	255.256	0.72	4.241	0.5	0.0129827	m/z, MS/MS	2	0.791	1.51	1.194	-0.34	0.59	0.26	0.307977	0.003656	0.07259	0.340628	0.004623	0.08426	-0.446337	0.334983	-0.736977	0.780319	-0.726016	0.41115
67	Homoserine	C4 H9 N O3	119.058	0.517692	10.823	0.12	0.0177832	m/z, RT, MS/MS	1	0.967	5.567	5.386	-0.05	2.48	2.43	0.637041	1e-15	1e-15	0.678448	2.97e-15	3.2e-15	-0.210907	0.0942816	-0.99036	0.929524	-0.984347	0.652966	Other
68	Hypoxanthine	C5 H4 N4 O	136.039	0.550833	8.74	0.5	0.0232763	m/z, RT, MS/MS	1	0.003	77.839	0.203	-8.59	6.28	-2.3	1e-15	1e-15	1e-15	3.82e-15	2.97e-15	3.2e-15	-0.994728	2.49208	-0.994848	3.05274	0.990098	0.22893
69	Imidazole-4-acetate	C5 H6 N2 O2	126.043	0.365556	8.541	0.5	0.0194472	m/z, RT	1	0.265	11.736	3.114	-1.91	3.55	1.64	1e-15	1e-15	1.26e-12	3.82e-15	2.97e-15	3.78e-12	-0.986107	0.595589	-0.993612	0.814348	-0.982324	0.254009	Other
70	Imidazolelactic acid	C6 H8 N2 O3	156.054	0.577778	8.292	0.5	0.0310078	m/z, MS/MS	2	0.284	114.287	32.418	-1.82	6.84	5.02	5.55e-13	1e-15	1e-15	2.04e-12	2.97e-15	3.2e-15	-0.981866	3.68721	-0.988634	5.33477	-0.996276	2.02819
71	Inosine	C10 H12 N4 O5	268.081	0.529167	8.973	0.5	0.0215022	m/z, RT	1	0.072	29.698	2.145	-3.79	4.89	1.1	1.18e-11	1e-15	0.000114	3.55e-11	2.97e-15	0.000155	-0.99431	0.391357	-0.996293	0.4924	-0.788651	0.0652627
72	Isobutyric acid	C4 H8 O2	88.0526	1.98111	6.931	0.5	0.0263656	m/z, MS/MS	2	127.709	0.719	91.863	7	-0.48	6.52	1e-15	0.008074	1e-15	3.82e-15	0.010028	3.2e-15	0.993352	2.87495	0.689958	0.187362	-0.993476	2.57708	tRNA charging;superpathway of branched chain amino acid biosynthesis;Other
73	Isoleucine	C6 H13 N O2	131.095	0.6775	9.035	0.123	0.0166667	m/z, RT, MS/MS	1	9.738	0.388	3.777	3.28	-1.37	1.92	1e-15	4.69e-12	1e-15	3.82e-15	1.2e-11	3.2e-15	0.995517	5.38364	0.986117	2.83982	-0.990726	4.3549	superpathway of branched chain amino acid biosynthesis;Other
74	Lactic acid	C3 H6 O3	90.0317	1.93412	8.42	0.5	0.1174	m/z, RT, MS/MS	1	331.805	0.376	124.811	8.37	-1.41	6.96	1e-15	2.88e-05	1e-15	3.82e-15	4.07e-05	3.2e-15	0.995052	8.11608	0.933554	0.707914	-0.994429	7.27016
75	Leucineamide	C6 H14 N2 O	130.111	0.243889	14.089	0.5	0.0170749	m/z, MS/MS	2	0.833	0.383	0.319	-0.26	-1.39	-1.65	0.021347	1.88e-10	1.7e-11	0.025786	3.97e-10	4.28e-11	-0.670995	1.10999	0.973939	5.0496	0.975406	3.87432	tRNA charging;Other
76	Leucinic acid	C6 H12 O3	132.079	1.58722	4.636	0.109	0.0187871	m/z, RT, MS/MS	1	1.712	1.434	2.456	0.78	0.52	1.3	2.12e-06	8.95e-05	1.56e-09	3.44e-06	0.000123	3.11e-09	0.927781	1.60846	-0.874272	1.321	-0.963248	1.78498	Other
77	Leucylproline	C11 H20 N2 O3	228.147	0.241667	5.133	0.5	0.022595	m/z, MS/MS	2	4.915	0.341	1.677	2.3	-1.55	0.75	1e-15	2.69e-13	9.07e-09	3.82e-15	7.88e-13	1.68e-08	0.997568	0.921795	0.987112	0.780285	-0.982754	0.594169	Other
78	Lysine	C6 H14 N2 O2	146.106	0.343333	16.132	0.5	0.0190505	m/z, RT	1	12.042	0.092	1.11	3.59	-3.44	0.15	1e-15	1e-15	0.087091	3.82e-15	2.97e-15	0.100635	0.990907	2.23221	0.987291	2.52616	-0.575242	0.59775
79	Malate	C4 H6 O5	134.022	1.73389	10.549	0.5	0.0120967	m/z, RT, MS/MS	1	6.985	0.369	2.578	2.8	-1.44	1.37	1e-15	1.43e-12	2.53e-12	3.82e-15	3.91e-12	7.31e-12	0.996715	4.06307	0.992813	2.64993	-0.989007	3.0817	Other
80	Malonic acid	C3 H4 O4	104.011	2.38111	10.259	0.5	0.0148512	m/z, MS/MS	2	0.787	1.27	1	-0.35	0.35	0	0.000285	0.000189	0.973844	0.000392	0.000254	0.992014	-0.830607	0.883587	-0.863716	1.12781	-0.0912424	0.0456989	tRNA charging;Other
81	Mannitol	C6 H14 O6	182.079	1.515	10.315	0.5	0.0231313	m/z, RT	1	0.588	1.158	0.681	-0.77	0.21	-0.55	0.001495	0.999326	0.001602	0.001966	0.999988	0.002032	-0.990802	0.34829	0.10999	0.0517761	0.614624	0.259707	glycolysis III (from glucose);myo-inositol biosynthesis;Other
82	Methionine	C5 H11 N O2 S	149.051	0.525556	9.124	0.5	0.0123433	m/z, RT	1	9.168	0.145	1.327	3.2	-2.79	0.41	1e-15	1e-15	5.39e-05	3.82e-15	2.97e-15	7.43e-05	0.995606	0.723746	0.991101	0.761617	-0.866486	0.313428
83	Methionine sulfoxide	C5 H11 N O3 S	165.046	0.577222	9.629	0.5	0.0153517	m/z, MS/MS	2	0.796	0.842	0.67	-0.33	-0.25	-0.58	0.000398	0.015613	1.69e-06	0.000543	0.019076	2.55e-06	-0.842106	0.566149	0.744353	0.561268	0.910518	0.698456
84	Methyhistidine	C7 H11 N3 O2	169.085	0.426111	9.456	0.5	0.0170346	m/z, RT	1	0.339	1.302	0.442	-1.56	0.38	-1.18	6.48e-13	0.000111	6.08e-11	2.36e-12	0.000152	1.42e-10	-0.97962	0.179659	-0.941391	0.128044	0.979371	0.129417
85	methylglyoxal	C3 H4 O2	72.0212	0.577222	10.199	0.5	0.0118687	m/z, RT	1	0.148	2.442	0.36	-2.76	1.29	-1.47	1e-15	1e-15	1e-15	3.82e-15	2.97e-15	3.2e-15	-0.99455	0.320272	-0.994159	0.326803	0.991649	0.160577	tRNA charging;Other
86	myo-Inositol	C6 H12 O6	180.064	1.45333	9.047	0.5	0.0194615	m/z, RT, MS/MS	1	0.593	0.974	0.577	-0.75	-0.04	-0.79	2.02e-09	0.733957	9.44e-10	4.38e-09	0.769166	1.92e-09	-0.9687	0.692353	0.315543	0.123533	0.963827	0.640876
87	N6-Acetylysine	C8 H16 N2 O3	188.116	0.295556	10.565	0.5	0.0170802	m/z, RT	1	63.061	0.283	17.857	5.98	-1.82	4.16	1e-15	3.21e-11	1e-15	3.82e-15	7.4e-11	3.2e-15	0.993926	1.19679	0.983525	0.295647	-0.993643	1.05247	superpathway of branched chain amino acid biosynthesis;Other
88	N-Acetyglucosamine	C8 H15 N O6	221.09	0.308333	9.282	0.5	0.0180867	m/z, RT	1	1.486	11.518	17.121	0.57	3.53	4.1	0.000548	1e-15	1e-15	0.00074	2.97e-15	3.2e-15	0.867844	0.450109	-0.982242	0.817287	-0.988552	0.739532	tRNA charging;L-arginine biosynthesis I (via L-ornithine);L-arginine biosynthesis II (acetyl cycle);Other
89	N-Acetyglutamate	C7 H11 N O5	189.064	0.426667	9.355	0.5	0.0207506	m/z, RT	1	1.344	2.451	3.294	0.43	1.29	1.72	0.000113	4.63e-11	3.91e-13	0.000159	1.05e-10	1.21e-12	0.876118	0.37316	-0.971266	0.648385	-0.988613	0.595432	Other
90	N-Acetylaspartic acid	C6 H9 N O5	175.048	0.886111	9.651	0.104	0.0898577	m/z, MS/MS	2	6.556	0.114	0.746	2.71	-3.13	-0.42	1e-15	1e-15	0.000568	3.82e-15	2.97e-15	0.000736	0.994075	1.2888	0.991237	1.85512	0.799707	0.630801
91	N-Acetylornithine	C7 H14 N2 O3	174.101	0.263333	9.879	0.5	0.0135157	m/z, MS/MS	2	1.946	0.328	0.637	0.96	-1.61	-0.65	1.3e-08	1.42e-11	5.58e-06	2.57e-08	3.4e-11	8.14e-06	0.957151	0.987165	0.986385	1.77058	0.902835	0.890812	L-arginine biosynthesis I (via L-ornithine);L-arginine biosynthesis II (acetyl cycle);Other
92	N-Acetymethionine	C7 H13 N O3 S	191.062	0.47	4.989	0.5	0.0110023	m/z, MS/MS	2	1.294	1.424	1.843	0.37	0.51	0.88	0.000294	3.48e-06	4.23e-09	0.000404	5.21e-06	8.07e-09	0.876737	0.314849	-0.909038	0.423927	-0.970903	0.436536	L-arginine biosynthesis I (via L-ornithine);L-arginine biosynthesis II (acetyl cycle);L-ornithine biosynthesis I
93	N-Acetyphenylalanine	C11 H13 N O3	207.09	0.383333	4.6	0.5	0.0172892	m/z, RT	1	0.306	5.272	1.613	-1.71	2.4	0.69	3.92e-13	1e-15	1.12e-07	1.46e-12	2.97e-15	1.86e-07	-0.980079	0.626369	-0.984494	0.839548	-0.92956	0.231245	Other
94	Ne,Ne dimethyllysine	C8 H18 N2 O2	174.137	0.421111	14.431	0.5	0.009874	m/z, RT	1	3.543	4.703	16.662	1.82	2.23	4.06	9.06e-12	1e-15	1e-15	2.78e-11	2.97e-15	3.2e-15	0.986591	0.956048	-0.977601	0.660245	-0.992456	0.988382
95	N-Isovalerylglycine	C7 H13 N O3	159.09	1.065	4.904	0.118	0.0661673	m/z, MS/MS	2	0.503	4.113	2.067	-0.99	2.04	1.05	3.14e-09	1e-15	4.82e-10	6.62e-09	2.97e-15	1.01e-09	-0.964575	0.443581	-0.98516	0.688881	-0.976762	0.299344
96	Nonanoic acid	C9 H18 O2	158.131	1.43167	4.009	0.5	0.0145976	m/z, MS/MS	2	1.113	1.352	1.505	0.15	0.44	0.59	0.779864	0.731327	0.346832	0.818281	0.767038	0.380636	0.321827	0.111762	-0.188529	0.0639187	-0.391292	0.12758
97	Norleucine	C6 H13 N O2	131.095	0.282778	8.809	0.123	0.0158584	m/z, RT, MS/MS	1	8.585	0.129	1.105	3.1	-2.96	0.14	1e-15	1e-15	0.099532	3.82e-15	2.97e-15	0.114545	0.992894	6.54205	0.994833	7.60344	-0.562592	1.46934	tRNA charging;Other
98	O-Acetylserine	C5 H9 N O4	147.053	1.71611	8.02	0.5	0.0531814	m/z, MS/MS	2	13.426	1.92	25.784	3.75	0.94	4.69	1e-15	5.43e-05	1e-15	3.82e-15	7.54e-05	3.2e-15	0.995274	0.816757	-0.850287	0.161302	-0.994891	0.744623
99	Octadecanoic acid	C18 H36 O2	284.272	0.682222	3.677	0.5	0.0236222	m/z, RT	1	1.887	0.699	1.319	0.92	-0.52	0.4	0.008594	0.109542	0.40271	0.010673	0.126235	0.439883	0.915539	0.168557	0.475032	0.126791	-0.260115	0.0381829
100	Oleamide	C18 H35 N O	281.272	0.622778	4.163	0.5	0.00680933	m/z, MS/MS	2	0.821	1.369	1.123	-0.29	0.45	0.17	0.469487	0.058865	0.412762	0.510208	0.069561	0.450285	-0.374118	1.06222	-0.588826	2.19587	-0.533081	0.988237
101	Oleic acid	C18 H34 O2	282.256	0.716667	3.684	0.5	0.0101998	m/z, MS/MS	2	7.285	9.355	68.145	2.86	3.23	6.09	3.82e-08	5.03e-09	1.96e-13	7.19e-08	9.34e-09	6.18e-13	0.990658	0.599464	-0.956654	0.278129	-0.992379	0.577284
102	Ornithine	C5 H12 N2 O2	132.09	0.278235	15.186	0.5	0.032971	m/z, RT	1	0.02	3.427	0.07	-5.62	1.78	-3.85	4.97e-11	0.000211	8.44e-09	1.34e-10	0.000284	1.57e-08	-0.988593	0.509438	-0.974857	0.530018	0.982991	0.241677	Other
103	Palmitoleic acid	C16 H30 O2	254.225	1.03556	3.716	0.5	0.0143542	m/z, MS/MS	2	12.192	5.786	70.543	3.61	2.53	6.14	9.24e-10	1.32e-07	1e-15	2.1e-09	2.16e-07	3.2e-15	0.992051	0.551036	-0.9386	0.180611	-0.993772	0.513277
104	Pentadecanoic acid	C15 H30 O2	242.225	1.37556	3.737	0.5	0.0147625	m/z, MS/MS	2	0.011	94.264	1.01	-6.54	6.56	0.01	6.48e-13	1.59e-12	0.682299	2.36e-12	4.33e-12	0.723033	-0.973287	0.831932	-0.96662	1.02296	0.232377	0.0195294
105	Phenylacetylglycine	C10 H11 N O3	193.074	1.47889	4.852	0.5	0.00908983	m/z, RT	1	0.821	2.407	1.975	-0.29	1.27	0.98	0.000215	1e-15	1e-11	0.000299	2.97e-15	2.62e-11	-0.879262	0.144336	-0.986569	0.346681	-0.986456	0.212321	Other
106	Phenylalanine	C9 H11 N O2	165.079	0.301111	8.45	0.5	0.0235265	m/z, MS/MS	2	4.766	0.175	0.835	2.25	-2.51	-0.26	1e-15	1e-15	0.001948	3.82e-15	2.97e-15	0.002462	0.992543	3.79093	0.992283	5.31429	0.770707	1.63011	superpathway of branched chain amino acid biosynthesis;superpathway of L-isoleucine biosynthesis I;L-isoleucine biosynthesis I (from threonine);phosphopantothenate biosynthesis I
107	Picolinic acid	C6 H5 N O2	123.032	0.863889	6.99	0.5	0.0532691	m/z, RT	1	0.274	22.811	6.243	-1.87	4.51	2.64	1.7e-09	1e-15	2.35e-11	3.75e-09	2.97e-15	5.79e-11	-0.972766	0.622432	-0.992444	0.883957	-0.945945	0.308665
108	Pipecolic acid	C6 H11 N O2	129.079	0.577778	16.13	0.5	0.0169682	m/z, MS/MS	2	12.421	0.09	1.124	3.63	-3.47	0.17	1e-15	1e-15	0.055328	3.82e-15	2.97e-15	0.064812	0.991708	2.27573	0.98821	2.55643	-0.618496	0.656983	L-arginine biosynthesis I (via L-ornithine);L-arginine biosynthesis II (acetyl cycle);phosphopantothenate biosynthesis I;aminomethylphosphonate degradation;Other
109	Pipecolinic acid	C6 H11 N O2	129.079	0.498889	9.615	0.128	0.0177201	m/z, MS/MS	2	1.093	3.625	3.963	0.13	1.86	1.99	0.065692	1e-15	1e-15	0.07681	2.97e-15	3.2e-15	0.665072	0.331313	-0.985332	1.2086	-0.990459	0.954429	tRNA charging;L-arginine biosynthesis I (via L-ornithine);L-arginine biosynthesis II (acetyl cycle);Other
110	Proline	C5 H9 N O2	115.063	0.211667	9.806	0.5	0.016061	m/z, RT, MS/MS	1	2.458	2.71	6.663	1.3	1.44	2.74	7.06e-12	2.06e-13	1e-15	2.22e-11	6.05e-13	3.2e-15	0.990372	6.04143	-0.985467	5.03692	-0.994879	6.57188	tRNA charging;L-proline biosynthesis I
111	Pyridoxamine	C8 H12 N2 O2	168.09	0.210556	5.413	0.5	0.0429905	m/z, MS/MS	2	6.206	0.058	0.361	2.63	-4.1	-1.47	1e-15	1e-15	9.4e-11	3.82e-15	2.97e-15	2.13e-10	0.992748	1.21085	0.988877	2.60415	0.965855	1.54547
112	Pyridoxine	C8 H11 N O3	169.074	0.262778	7.333	0.112	0.0184018	m/z, RT	1	1.684	6.261	10.542	0.75	2.65	3.4	4.46e-06	1e-15	1e-15	7.04e-06	2.97e-15	3.2e-15	0.983759	0.35282	-0.997422	0.494653	-0.997293	0.482144	Other
113	Pyruvic acid	C3 H4 O3	88.0162	2.11889	7.03	0.5	0.0617493	m/z, MS/MS	2	5.569	1.629	9.069	2.48	0.7	3.18	2.12e-12	0.000214	1e-15	7.26e-12	0.000288	3.2e-15	0.991663	2.05145	-0.845856	0.627274	-0.994009	1.90855	tRNA charging;Other
114	Quinic acid	C7 H12 O6	192.064	1.72667	9.628	0.5	0.0397448	m/z, MS/MS	2	4.795	57.655	276.475	2.26	5.85	8.11	1e-15	1e-15	1e-15	3.82e-15	2.97e-15	3.2e-15	0.996136	0.787458	-0.996181	0.487733	-0.996856	0.791873	Other
115	Raffinose	C18 H32 O16	504.17	0.955	11.751	0.116	0.0254447	m/z, MS/MS	2	2.066	1.528	3.157	1.05	0.61	1.66	1.61e-08	3.6e-05	3.64e-11	3.17e-08	5.06e-05	8.8e-11	0.965316	0.274481	-0.914998	0.182095	-0.974274	0.283428
116	Ribose	C5 H10 O5	150.053	1.25722	8.19	0.096	0.0443261	m/z, MS/MS	2	1.09	0.741	0.808	0.12	-0.43	-0.31	0.167201	0.001392	0.061591	0.189688	0.001809	0.071884	0.571544	0.178148	0.870317	0.436327	0.524996	0.194235
117	S-Adenosyhomocysteine	C14 H20 N6 O5 S	384.122	0.3175	9.856	0.5	0.0209463	m/z, RT	1	77.603	0.536	41.585	6.28	-0.9	5.38	1e-15	0.001011	1.18e-13	3.82e-15	0.001325	3.76e-13	0.929978	0.378843	0.761783	0.0513903	-0.936956	0.337405	Other
118	Serine	C3 H7 N O3	105.043	0.321667	11.138	0.5	0.0147379	m/z, RT, MS/MS	1	3.564	0.166	0.59	1.83	-2.59	-0.76	1e-15	1e-15	6.97e-09	3.82e-15	2.97e-15	1.31e-08	0.994552	1.11397	0.99382	1.94976	0.963666	0.996383	tRNA charging;Other
119	sn-Glycero-3-Phosphocholine	C8 H20 N O6 P	257.103	0.201667	10.203	0.5	0.00744611	m/z, RT	1	1.375	1.839	2.529	0.46	0.88	1.34	0.000835	2.03e-07	9.85e-10	0.001115	3.29e-07	2.01e-09	0.851665	0.965426	-0.938804	1.46053	-0.972429	1.42366
120	Succinate	C4 H6 O4	118.027	2.47667	9.969	0.5	0.0348368	m/z, RT	1	0.145	0.235	0.034	-2.78	-2.09	-4.87	4.34e-06	1.84e-06	2.53e-10	6.86e-06	2.81e-06	5.5e-10	-0.799704	0.182943	0.979866	0.557293	0.991771	0.448141
121	Sucrose	C12 H22 O11	342.116	0.804444	10.791	0.12	0.0145233	m/z, RT, MS/MS	1	14.752	0.037	0.549	3.88	-4.75	-0.87	1e-15	1e-15	1.87e-08	3.82e-15	2.97e-15	3.37e-08	0.995822	2.30946	0.992484	3.91571	0.955674	1.92949
122	Threonic acid	C4 H8 O5	136.037	2.15687	8.732	0.105	0.0670027	m/z, MS/MS	2	9.337	0.181	1.689	3.22	-2.47	0.76	1e-15	1e-15	2.18e-08	3.82e-15	2.97e-15	3.9e-08	0.993466	1.96204	0.993331	1.77355	-0.954081	1.17193
123	Threonine	C4 H9 N O3	119.058	0.320556	10.422	0.12	0.0133991	m/z, RT, MS/MS	1	5.668	0.298	1.691	2.5	-1.74	0.76	1e-15	3.58e-13	2.23e-07	3.82e-15	1.03e-12	3.64e-07	0.9975	2.89304	0.983853	2.5569	-0.959064	1.76462
124	Thymine	C5 H6 N2 O2	126.042	1.225	7.047	0.5	0.0327237	m/z, RT	1	27.054	0.922	24.946	4.76	-0.12	4.64	1e-15	0.877265	1e-15	3.82e-15	0.904514	3.2e-15	0.971089	0.354721	0.139265	0.00511808	-0.975527	0.318411
125	Trehalose	C12 H22 O11	342.116	0.81	11.174	0.12	0.0777227	m/z, MS/MS	2	293.987	0.031	9.074	8.2	-5.02	3.18	1e-15	1e-15	1e-15	3.82e-15	2.97e-15	3.2e-15	0.994021	1.49815	0.980942	0.592634	-0.991047	1.27205
126	Trigonelline	C7 H7 N O2	137.048	0.46	9.24	0.104	0.0123007	m/z, MS/MS	2	0.513	1.337	0.686	-0.96	0.42	-0.54	1.3e-10	8.65e-06	3.37e-07	3.29e-10	1.26e-05	5.42e-07	-0.972804	2.08879	-0.916552	1.80139	0.936623	1.27485
127	Trimethylysine	C9 H20 N2 O2	188.153	0.185556	14.683	0.5	0.00984483	m/z, MS/MS	2	0.723	2.467	1.783	-0.47	1.3	0.83	0.000238	9.29e-10	4.6e-07	0.000328	1.84e-09	7.31e-07	-0.840067	0.435257	-0.961995	0.824976	-0.936469	0.424939	Other
128	Tryptophan	C11 H12 N2 O2	204.09	0.548333	9.497	0.5	0.0176802	m/z, RT, MS/MS	1	5.849	0.04	0.237	2.55	-4.63	-2.08	1e-15	1e-15	1.61e-12	3.82e-15	2.97e-15	4.77e-12	0.987089	0.883093	0.991205	2.3707	0.981672	1.52829	Other
129	Tyrosine	C9 H11 N O3	181.074	0.418889	10.007	0.5	0.0191857	m/z, RT, MS/MS	1	6.607	0.196	1.296	2.72	-2.35	0.37	1e-15	1e-15	0.000214	3.82e-15	2.97e-15	0.000284	0.994638	0.993635	0.992893	1.05732	-0.852891	0.414925	tRNA charging;superpathway of L-methionine biosynthesis (by sulfhydrylation);L-methionine biosynthesis III;Other
130	UMP	C9 H13 N2 O9 P	324.036	0.815	9.925	0.101	0.021726	m/z, RT	1	176.089	0.111	19.512	7.46	-3.17	4.29	1e-15	1e-15	1e-15	3.82e-15	2.97e-15	3.2e-15	0.993978	0.348072	0.957721	0.0940417	-0.990294	0.304555
131	Uracil	C4 H4 N2 O2	112.028	2.19944	8.017	0.12	0.0481563	m/z, RT	1	3.01	4.749	14.291	1.59	2.25	3.84	8.63e-07	1.52e-08	6.67e-12	1.45e-06	2.7e-08	1.8e-11	0.976144	0.428301	-0.950571	0.315561	-0.988995	0.452205	L-arginine biosynthesis I (via L-ornithine);L-arginine biosynthesis II (acetyl cycle);Other
132	Uridine	C9 H12 N2 O6	244.07	0.471111	8.517	0.5	0.0180876	m/z, RT	1	0.941	2.548	2.399	-0.09	1.35	1.26	0.418969	2.3e-12	6.12e-12	0.457252	6.16e-12	1.66e-11	-0.320133	0.0503058	-0.982616	0.349172	-0.988028	0.243108
133	Urocanic acid	C6 H6 N2 O2	138.043	0.583333	8.269	0.5	0.03002	m/z, MS/MS	2	0.005	412.4	2.19	-7.56	8.69	1.13	1e-15	1e-15	0.000239	3.82e-15	2.97e-15	0.000316	-0.989687	4.34307	-0.989055	5.35655	-0.833801	0.195371
134	Valeric acid	C5 H10 O2	102.068	2.35111	4.977	0.5	0.011899	m/z, MS/MS	2	13.745	1.285	17.663	3.78	0.36	4.14	1e-15	0.002045	1e-15	3.82e-15	0.002624	3.2e-15	0.994824	1.1325	-0.797005	0.170519	-0.993955	1.02654	aminomethylphosphonate degradation;Other
135	Valine	C5 H11 N O2	117.079	0.270556	9.596	0.5	0.0180712	m/z, RT, MS/MS	1	10.636	0.51	5.426	3.41	-0.97	2.44	1e-15	3.04e-10	1e-15	3.82e-15	6.33e-10	3.2e-15	0.996285	6.17267	0.976783	2.32192	-0.994176	5.26905	Other
136	Xanthine	C5 H4 N4 O2	152.034	1.52333	8.86	0.5	0.0209186	m/z, RT, MS/MS	1	0.167	19.043	3.186	-2.58	4.25	1.67	1e-15	1e-15	1e-15	3.82e-15	2.97e-15	3.2e-15	-0.996702	1.01655	-0.997909	1.3366	-0.985475	0.340518
137	δ-Gluconic acid δ-lactone	C6 H10 O6	178.048	1.21389	8.575	0.138	0.0244092	m/z, MS/MS	2	0.188	8.719	1.635	-2.41	3.12	0.71	1e-15	1e-15	1.83e-08	3.82e-15	2.97e-15	3.3e-08	-0.990421	0.838467	-0.991888	1.07834	-0.951798	0.219855
*MSI classifcation: level 1: the metabolites identified using m/z, RT and/or MS/MS of reference standards, level 2: putatively annotated metabolites using m/z, RT and/or MS/MS from spectral library and no reference standards, level 3: putatively characterised metabolite classes and level 4: unknowns.

## Sheet: Table S3 Metabolites
Table S3 The significantly changed metabolites in the spent media of magnetosome producing cells compared to non-magnetosome producing cells
Metabolite	Monoisotopic mass (Da)	Formula	Method of identification	Level of identification based on MSI protocol*	Log2 Fold Change	Adj. P-value	OPLS-DA p(corr)	OPLS-DA VIP
2,2-Dimethylsuccinic acid	146.058	C6 H10 O4	m/z, MS/MS	2	6.29	2.98e-11	0.990386	1.09832
2-Hydroxyglutarate	148.037	C5 H8 O5	m/z, RT, MS/MS	1	1.85	2.36e-11	0.989574	2.74468
2-Isopropylmalic acid	176.069	C7 H12 O5	m/z, MS/MS	2	2.79	3.82e-15	0.990761	2.62881
3-Methy2-oxobutanoic acid	116.048	C5 H8 O3	m/z, RT, MS/MS	1	5.21	3.82e-15	0.993819	1.87081
3-Phenyllactic acid	166.063	C9 H10 O3	m/z, MS/MS	2	2.41	3.82e-15	0.989981	1.22618
3-Ureidopropionic acid	132.054	C4 H8 N2 O3	m/z, MS/MS	2	-6.94	3.82e-15	-0.994912	1.37712
4-Aminohippuricacid	194.069	C9 H10 N2 O3	m/z, RT	1	4.53	3.82e-15	0.994957	1.94446
4-Guanidinobutyric acid	145.085	C5 H11 N3 O2	m/z, MS/MS	2	-1.38	1.51e-10	-0.97686	1.06161
4-Oxoproline	129.043	C5 H7 N O3	m/z, MS/MS	2	-2.67	6.89e-07	-0.876838	1.77903
5-Oxoproline	129.043	C5 H7 N O3	m/z, RT, MS/MS	1	-1.33	1.32e-08	-0.990949	3.5433
Acetoin	88.0526	C4 H8 O2	m/z, RT, MS/MS	1	7.66	3.82e-15	0.964326	1.7471
Adenine	135.055	C5 H5 N5	m/z, RT, MS/MS	1	-0.56	2.37e-08	-0.950366	2.13348
Alanine	89.0477	C3 H7 N O2	m/z, RT, MS/MS	1	3.52	3.82e-15	0.996571	4.2306
AMP	347.063	C10 H14 N5 O7 P	m/z, RT, MS/MS	1	9.12	3.82e-15	0.996207	1.17274
Arginine	174.112	C6 H14 N4 O2	m/z, RT, MS/MS	1	2.49	3.82e-15	0.993535	4.2731
Betaine	117.079	C5 H11 N O2	m/z, RT, MS/MS	1	0.43	2.01e-07	0.970407	4.05838
Choline	103.1	C5 H13 N O	m/z, MS/MS	2	-0.57	0.000146	-0.876389	3.11565
Citrulline	175.096	C6 H13 N3 O3	m/z, RT, MS/MS	1	3	3.82e-15	0.995191	3.93154
Crotonic acid	86.0369	C4 H6 O2	m/z, MS/MS	2	5.88	3.82e-15	0.99075	1.0874
Cytosine	111.043	C4 H5 N3 O	m/z, RT, MS/MS	1	2.88	3.82e-15	0.994187	1.99528
Gluconic acid	196.059	C6 H12 O7	m/z, RT, MS/MS	1	-1.68	3.82e-15	-0.984838	1.34878
Glutamate	147.053	C5 H9 N O4	m/z, RT, MS/MS	1	-3.15	3.82e-15	-0.991989	2.28401
Guanine	151.049	C5 H5 N5 O	m/z, RT	1	7.16	3.82e-15	0.994888	1.50457
Hypoxanthine	136.039	C5 H4 N4 O	m/z, RT, MS/MS	1	-8.59	3.82e-15	-0.994728	2.49208
Imidazolelactic acid	156.054	C6 H8 N2 O3	m/z, MS/MS	2	-1.82	2.04e-12	-0.981866	3.68721
Isobutyric acid	88.0526	C4 H8 O2	m/z, MS/MS	2	7	3.82e-15	0.993352	2.87495
Isoleucine	131.095	C6 H13 N O2	m/z, RT, MS/MS	1	3.28	3.82e-15	0.995517	5.38364
Lactic acid	90.0317	C3 H6 O3	m/z, RT, MS/MS	1	8.37	3.82e-15	0.995052	8.11608
Leucineamide	130.111	C6 H14 N2 O	m/z, MS/MS	2	-0.26	0.025786	-0.670995	1.10999
Leucinic acid	132.079	C6 H12 O3	m/z, RT, MS/MS	1	0.78	3.44e-06	0.927781	1.60846
Lysine	146.106	C6 H14 N2 O2	m/z, RT	1	3.59	3.82e-15	0.990907	2.23221
Malate	134.022	C4 H6 O5	m/z, RT, MS/MS	1	2.8	3.82e-15	0.996715	4.06307
N6-Acetylysine	188.116	C8 H16 N2 O3	m/z, RT	1	5.98	3.82e-15	0.993926	1.19679
N-Acetylaspartic acid	175.048	C6 H9 N O5	m/z, MS/MS	2	2.71	3.82e-15	0.994075	1.2888
Norleucine	131.095	C6 H13 N O2	m/z, RT, MS/MS	1	3.1	3.82e-15	0.992894	6.54205
Phenylalanine	165.079	C9 H11 N O2	m/z, MS/MS	2	2.25	3.82e-15	0.992543	3.79093
Pipecolic acid	129.079	C6 H11 N O2	m/z, MS/MS	2	3.63	3.82e-15	0.991708	2.27573
Proline	115.063	C5 H9 N O2	m/z, RT, MS/MS	1	1.3	2.22e-11	0.990372	6.04143
Pyridoxamine	168.09	C8 H12 N2 O2	m/z, MS/MS	2	2.63	3.82e-15	0.992748	1.21085
Pyruvic acid	88.0162	C3 H4 O3	m/z, MS/MS	2	2.48	7.26e-12	0.991663	2.05145
Serine	105.043	C3 H7 N O3	m/z, RT, MS/MS	1	1.83	3.82e-15	0.994552	1.11397
Sucrose	342.116	C12 H22 O11	m/z, RT, MS/MS	1	3.88	3.82e-15	0.995822	2.30946
Threonic acid	136.037	C4 H8 O5	m/z, MS/MS	2	3.22	3.82e-15	0.993466	1.96204
Threonine	119.058	C4 H9 N O3	m/z, RT, MS/MS	1	2.5	3.82e-15	0.9975	2.89304
Trehalose	342.116	C12 H22 O11	m/z, MS/MS	2	8.2	3.82e-15	0.994021	1.49815
Trigonelline	137.048	C7 H7 N O2	m/z, MS/MS	2	-0.96	3.29e-10	-0.972804	2.08879
Urocanic acid	138.043	C6 H6 N2 O2	m/z, MS/MS	2	-7.56	3.82e-15	-0.989687	4.34307
Valeric acid	102.068	C5 H10 O2	m/z, MS/MS	2	3.78	3.82e-15	0.994824	1.1325
Valine	117.079	C5 H11 N O2	m/z, RT, MS/MS	1	3.41	3.82e-15	0.996285	6.17267
Xanthine	152.034	C5 H4 N4 O2	m/z, RT, MS/MS	1	-2.58	3.82e-15	-0.996702	1.01655
*MSI classifcation: level 1: the metabolites identified using m/z, RT and/or MS/MS of reference standards, level 2: putatively annotated metabolites using m/z, RT and/or MS/MS from spectral library and no reference standards, level 3: putatively characterised metabolite classes and level 4: unknowns.

## Sheet: Table S4 Significant pathways
Table S4 Significantly affected metabolic pathways in the magnetosome producing cells compared to non-magnetosome producing cells
Pathway	Total number of metabolites		p-value	Log (p-value)	Adjusted p-value*	Pathway Impact
	Pathway	Hits
Alanine, aspartate and glutamate metabolism	22	3	3.54e-12	26.37	2.46e-11	0.32
Aminoacyl-tRNA biosynthesis	45	10	1.68e-10	22.51	2.22e-10	0.2
Arginine and proline metabolism	29	3	5.56e-10	21.31	6.42e-10	0.19
Arginine biosynthesis	16	3	8.61e-11	23.18	1.69e-10	0.33
Ascorbate and aldarate metabolism	18	1	1.23e-10	22.82	1.69e-10	0.01
Benzoate degradation	15	1	1.23e-10	22.82	1.69e-10
beta-Alanine metabolism	13	1	1.32e-13	29.65	2.98e-12
Butanoate metabolism	17	2	7.08e-13	27.98	1.06e-11	0.17
C5-Branched dibasic acid metabolism	8	1	1.23e-10	22.82	1.69e-10
Citrate cycle (TCA cycle)	20	2	7.02e-11	23.38	1.69e-10	0.05
Cyanoamino acid metabolism	17	1	2.73e-10	22.02	3.23e-10
Cysteine and methionine metabolism	40	2	8.51e-11	23.19	1.69e-10	0.03
D-Alanine metabolism	3	1	3.01e-11	24.23	8.46e-11
D-Glutamine and D-glutamate metabolism	7	1	5.46e-12	25.93	2.46e-11	0.17
Dioxin degradation	7	1	1.23e-10	22.82	1.69e-10
Galactose metabolism	39	1	1.24e-10	22.81	1.69e-10	0.03
Glutathione metabolism	22	2	5.19e-12	25.99	2.46e-11	0.01
Glycerophospholipid metabolism	22	1	8.43e-05	9.38	8.43e-05
Glycine, serine and threonine metabolism	33	5	1.11e-13	29.83	2.98e-12	0.28
Glycolysis / Gluconeogenesis	29	1	1.23e-10	22.82	1.69e-10	0.08
Glyoxylate and dicarboxylate metabolism	37	4	6.82e-12	25.71	2.79e-11	0.11
Lysine biosynthesis	13	1	5.63e-09	19	5.76e-09	0
Lysine degradation	17	1	5.63e-09	19	5.76e-09	0
Methane metabolism	26	3	7.29e-11	23.34	1.69e-10	0.15
Monobactam biosynthesis	8	1	1.23e-10	22.82	1.69e-10
Nitrogen metabolism	11	1	5.46e-12	25.93	2.46e-11
Pantothenate and CoA biosynthesis	24	3	2.77e-11	24.31	8.46e-11
Pentose and glucuronate interconversions	35	1	1.23e-10	22.82	1.69e-10
Pentose phosphate pathway	26	2	3.02e-12	26.53	2.46e-11	0.04
Phenylalanine metabolism	33	2	1.05e-09	20.68	1.18e-09
Phenylalanine, tyrosine and tryptophan biosynthesis	23	1	2.48e-09	19.81	2.66e-09
Porphyrin and chlorophyll metabolism	36	1	5.46e-12	25.93	2.46e-11
Purine metabolism	73	5	2.73e-11	24.33	8.46e-11	0.1
Pyrimidine metabolism	51	2	1.52e-11	24.91	5.71e-11	0.02
Pyruvate metabolism	26	4	2.71e-10	22.03	3.23e-10	0.43
Selenocompound metabolism	15	1	3.01e-11	24.23	8.46e-11
Starch and sucrose metabolism	22	2	2.07e-10	22.3	2.66e-10	0.03
Sulfur metabolism	20	1	2.73e-10	22.02	3.23e-10
Terpenoid backbone biosynthesis	16	1	1.23e-10	22.82	1.69e-10
Thiamine metabolism	23	1	1.23e-10	22.82	1.69e-10
Valine, leucine and isoleucine biosynthesis	22	5	9.09e-11	23.12	1.69e-10	0.16
Valine, leucine and isoleucine degradation	23	2	6.93e-11	23.39	1.69e-10
Vitamin B6 metabolism	13	1	1.18e-09	20.55	1.3e-09	0.02
Xylene degradation	7	1	1.23e-10	22.82	1.69e-10
*p-values were adjusted using Benjamini Hochberg FDR

## Sheet: Component
Component Name		Curve Index	Weighting Index	Origin Index	Equation
							Specified	Calculated
Filename	Sample Type	Sample Name	Integ. Type	Area	ISTD Area	Area Ratio	Amount	Amount	%Diff	%RSD	Peak Status	Level	Units	RT	Sample ID	Excluded
